# Supplementary material for: Suprafamilial relationships among Rodentia and the phylogenetic effect of removing fast-evolving nucleotides in mitochondrial, exon and intron fragments
Source: PubMed Central journal article supplement (PMC2613922; doi:10.1186/1471-2148-8-321), 2008-11-26
Supplement: 1471-2148-8-321-S3.pdf [file 1471-2148-8-321-S3.pdf]

### Additional file 3 – Taxon and gene samplings

The taxonomic arrangement follows Carleton and Musser [3]. When sequences were not available from the same species a chimera has been built between genes of different species and is noted “sp” as species name. For Hystricidae and Physeteridae, a chimera has been built between two genera. MGF: Stem cell factor; PRKC: protein kinase C; SPTBN:  $\beta$ -spectrin non erythrocytic 1; THY: Thyrothropin; vWF: the exon 28 of von Willebrand factor; IRBP: exon one of the interphotoreceptor retinoid-binding protein; *CYTb*: mitochondrial cytochrome *b*; 12S rRNA: mitochondrial 12S ribosomal RNA.

\* denote sequences that have been obtained for the present study and – means that no sequence is available

---

#### SUBORDER

| Family               | MGF | PRKC | SPTBN | THY | vWF | IRBP | CYTb | 12S rRNA |
|----------------------|-----|------|-------|-----|-----|------|------|----------|
| <i>Genus species</i> |     |      |       |     |     |      |      |          |

---

#### SCIUROMORPHA

##### Sciuridae

|                        |           |          |          |          |          |          |          |          |
|------------------------|-----------|----------|----------|----------|----------|----------|----------|----------|
| <i>Tamiasciurus</i> sp | DQ318969  | DQ318975 | AJ536396 | AJ536366 | -        | AY227622 | AF147643 | AY227555 |
| <i>Glaucomys</i> sp    | AM909781* | DQ318981 | AJ536397 | AJ536367 | AJ224667 | AY227598 | AJ389531 | AF038020 |

##### Aplodontidae

|                        |           |          |          |          |          |          |          |          |
|------------------------|-----------|----------|----------|----------|----------|----------|----------|----------|
| <i>Aplodontia rufa</i> | AM909782* | DQ318982 | AJ536398 | AJ536364 | AJ224662 | AJ427238 | AJ389528 | AJ389541 |
|------------------------|-----------|----------|----------|----------|----------|----------|----------|----------|

|                             |           |           |           |           |           |           |          |          |
|-----------------------------|-----------|-----------|-----------|-----------|-----------|-----------|----------|----------|
| Gliridae                    |           |           |           |           |           |           |          |          |
| <i>Dryomys nitedula</i>     | AM909780* | AM909784* | AJ536388  | AJ536360  | AJ224666  | AJ427236  | AJ225116 | AJ225119 |
| <i>Graphiurus murinus</i>   | AM909779* | AM909783* | AJ536395  | AJ536371  | -         | AY303219  | AJ225115 | AJ225118 |
| MYOMORPHA                   |           |           |           |           |           |           |          |          |
| Muridae                     |           |           |           |           |           |           |          |          |
| <i>Mus musculus</i>         | DQ318971  | DQ318977  | AL731792  | DQ318962  | AJ238390  | NM_015745 | EF108344 | EF108344 |
| <i>Acomys</i> sp            | AM909770* | AM909789* | AM909797* | AM909818* | AJ402715  | AY326074  | X96996   | X84387   |
| Cricetidae                  |           |           |           |           |           |           |          |          |
| <i>Microtus</i> sp          | AM909771* | AM909790* | AM909798* | AM909819* | FM200055* | AY163593  | U54488   | X99464   |
| <i>Mesocricetus auratus</i> | AM909772* | -         | AM909799* | AM909820* | AJ402706  | AB164047  | AF119265 | X84390   |
| Spalacidae                  |           |           |           |           |           |           |          |          |
| <i>Spalax</i> sp            | AM909773* | AM909791* | AM909800* | AM909821* | U31621    | U48589    | AJ389537 | AJ250357 |
| Dipodidae                   |           |           |           |           |           |           |          |          |
| <i>Jaculus jaculus</i>      | -         | AM909837* | AM909832* | AM909827* | AJ297765  | -         | AJ416890 | AJ416890 |
| <i>Dipus sagitta</i>        | AM909768* | AM909787* | AM909809* | AM909825* | AJ224665  | AJ427232  | AM407909 | AJ319807 |
| <i>Allactaga</i> sp         | AM909769* | AM909788* | AM909810* | AM909815* | AJ224661  | AY326076  | AJ389534 | AJ389545 |

|                              |           |           |           |           |           |           |          |          |
|------------------------------|-----------|-----------|-----------|-----------|-----------|-----------|----------|----------|
| <i>Napaeozapus insignis</i>  | AM909839* | AM909838* | AM909833* | AM909826* | -         | AY326098  | AJ389535 | AJ389546 |
| <i>Sicista</i> sp            | AM909767* | AM909786* | AM909808* | AM909822* | AJ297764  | FM200058* | -        | -        |
| ANOMALUROMORPHA              |           |           |           |           |           |           |          |          |
| Anomaluridae                 |           |           |           |           |           |           |          |          |
| <i>Anomalurus</i> sp         | AM909775* | AM909793* | AM909806* | AM909816* | AJ427229  | AJ427240  | AM159537 | AJ389539 |
| <i>Idiurus macrotis</i>      | AM909774* | AM909792* | AM909807* | AM909817* | FM200056* | -         | AJ389525 | AJ389538 |
| Pedetidae                    |           |           |           |           |           |           |          |          |
| <i>Pedetes</i> sp            | DQ318972  | DQ318978  | AM909831* | DQ318963  | AJ238389  | AJ427241  | AJ389527 | AJ389540 |
| CASTORIMORPHA                |           |           |           |           |           |           |          |          |
| Castoridae                   |           |           |           |           |           |           |          |          |
| <i>Castor</i> sp             | DQ318970  | DQ318976  | AM909834* | DQ318961  | AJ427228  | AJ427239  | AJ389529 | AJ389542 |
| Geomyidae                    |           |           |           |           |           |           |          |          |
| <i>Geomys</i> sp             | -         | -         | AM909804* | -         | -         | AM407914  | AF158693 | U67300   |
| <i>Cratogeomys castanops</i> | -         | AM909835* | AM909830* | -         | -         | -         | L11902   | U67299   |
| <i>Thomomys</i> sp           | AM909766* | AM909785* | AM909813* | -         | AJ427227  | AJ427234  | AF215808 | AF084289 |
| Heteromyidae                 |           |           |           |           |           |           |          |          |

|                            |           |           |           |           |          |           |          |          |
|----------------------------|-----------|-----------|-----------|-----------|----------|-----------|----------|----------|
| <i>Dipodomys</i> sp        | -         | -         | AM909805* | -         | AJ427226 | AJ427233  | AF172837 | U59173   |
| <i>Heteromys gaumeri</i>   | -         | AM909836* | AM909803* | AM909823* | -        | FM200057* | AJ389536 | AJ389547 |
| <b>HYSTRICOMORPHA</b>      |           |           |           |           |          |           |          |          |
| Ctenodactylidae            |           |           |           |           |          |           |          |          |
| <i>Ctenodactylus vali</i>  | AM909778* | AM909796* | AM909812* | -         | AJ238387 | -         | AJ389532 | AJ389543 |
| <i>Massoutiera mzabi</i>   | AM909777* | AM909795* | AM909811* | AM909824* | AJ238388 | AJ427242  | AJ389533 | AJ389544 |
| Thryonomyidae              |           |           |           |           |          |           |          |          |
| <i>Thryonomys</i> sp       | DQ318974  | DQ318980  | AM909801* | DQ318965  | AJ224674 | AJ427243  | AJ301644 | AJ301644 |
| Bathyergidae               |           |           |           |           |          |           |          |          |
| <i>Bathyergus</i> sp       | AM909840* | DQ318983  | AM909828* | DQ318968  | AJ238384 | AJ427251  | AF012241 | M63565   |
| Caviidae                   |           |           |           |           |          |           |          |          |
| <i>Cavia porcellus</i>     | AM909776* | AM909794* | AM909802* | AM909814* | AJ224663 | AJ427248  | AJ222767 | AJ222767 |
| Hystricidae                |           |           |           |           |          |           |          |          |
|                            | DQ318973  | DQ318979  | AM909829* | DQ318964  | AJ224675 | AJ427245  | X70674   | U12448   |
| Number of rodent sequences | 25        | 27        | 30        | 25        | 24       | 26        | 29       | 29       |

## **OUTGROUP**

Lagomorpha

|                              |          |          |          |          |          |           |           |           |
|------------------------------|----------|----------|----------|----------|----------|-----------|-----------|-----------|
| <i>Oryctolagus cuniculus</i> | AY292741 | AY292768 | AY292810 | AY292665 | U31618   | Z11812    | AJ001588  | AJ001588  |
| <i>Lepus sp</i>              | AY292756 | AY292783 | AY292825 | AY292680 | AJ224669 | AJ427250  | AJ421471  | AJ421471  |
| <i>Ochotona princeps</i>     | AY292740 | AY292766 | AY292809 | AY292664 | AJ224672 | AY057832  | AJ537415  | AJ537415  |
| Primates                     |          |          |          |          |          |           |           |           |
| <i>Homo sapiens</i>          | AC024941 | AC073288 | AC093110 | AL109660 | M25851   | NM_002900 | AY714024  | EF657704  |
| Cetartiodactyla              |          |          |          |          |          |           |           |           |
| <i>Sus scrofa</i>            | AF165604 | AF165605 | AF165606 | AF165609 | S78431   | U48588    | AY337045  | AY337045  |
| <i>Bos sp</i>                | AF165716 | AY029293 | AF165718 | AF165721 | X63820   | NM_174164 | DQ186266  | AY526085  |
| Physeteridae                 | AF165644 | AF165645 | AF165646 | AF165649 | AF108834 | U50818    | NC_002503 | NC_002503 |

List of chimera:

*Acomys sp* : *A. airensis* (Cytb) *A. dimidiatus* (MGF, PRKC, SPTBN, THY) *A. cahirinus* (VWF, 12S) *A. spinosissimus* (IRBP)

*Allactaga sp*: *A. elater* (MGF, PRKC, SPTBN, THY , VWF, CYTb, 12S) *A. sibirica* (IRBP)

*Bathyergus sp*: *B. genetta* (MGF, PRKC, SPTBN, THY, CYTb, 12S) *B. suillus* (VWF, IRBP)

*Bos sp* : *Bos taurus* (PRKC, VWF, IRBP, CYTb, 12S rRNA ) *Bos indicus* (MGF, SPTBN, THY)

*Castor sp*: *C. canadensis* (MGF, PRKC, SPTBN, THY, VWF, IRBP) *C. fiber* (CYTb, 12S)

*Dipodomys* sp: *D. merriami* (SPTBN, VWF, IRBP, CYTb) *D. ordii* (12S)

*Geomys* sp: *G. bursarius* (SPTBN, CYTb, 12S) *G. breviceps* (IRBP)

*Glaucomys* sp : *G. sp* (MGF, PRKC, SPTBN, THY) *G. volans* (VWF, IRBP, CYTb, 12S)

Hystricidae : *Hystrix africaeaustralis* (MGF, PRKC, SPTBN, THY, CYTb, 12S) *Trichys fasciculata* (VWF, IRBP)

*Lepus* sp: *L. capensis* (MGF, PRKC, SPTBN, THY) *L. europeus* (CYTb, 12S) *L. crawshayi* (VWF, IRBP)

*Microtus* sp : *M. arvalis* (MGF, PRKC, SPTBN, THY, CYTb) *M. nivalis* (12S) *M. sikimensis* (IRBP) *M. agrestis* (VWF)

*Pedetes* sp: *P. capensis* (MGF, PRKC, SPTBN, THY, 12S) *P. surdaster* (VWF, IRBP, CYTb)

Physeteridae: *Kogia breviceps* (MGF, PRKC, SPTBN, THY) *Physeter catodon* (VWF, IRBP, CYTb, 12S)

*Sicista* sp: *S. betulina* (MGF, PRKC, SPTBN, THY) *S. kazbegica* (IRBP, VWF)

*Spalax* sp : *S. ehrenbergi* (CytB, 12S) *S. leucodon* (MGF, PRKC, SPTBN, THY) *S. polonicus* (VWF) *S. zemni* (IRBP)

*Tamiasciurus* sp : *T. hudsonicus* (MGF, PRKC, IRBP, CYTb, 12S), *T. sp* (SPTBN, THY)

*Thomomys* sp: *T. bottae* (12S), *T. talpoides* (MGF, PRKC, SPTBN, VWF, IRBP, CYTb)

*Thryonomys* sp : *T. sp* (MGF, SPTBN, THY), *T. swinderianus* (PRKC, VWF, IRBP, CYTb, 12S)
